# Supplementary material
Source: Springer Nature journal article supplement (https://www.springermedizin.de/resource/supplementary/12874_2013_1031_MOESM3_ESM.pdf/9433484)

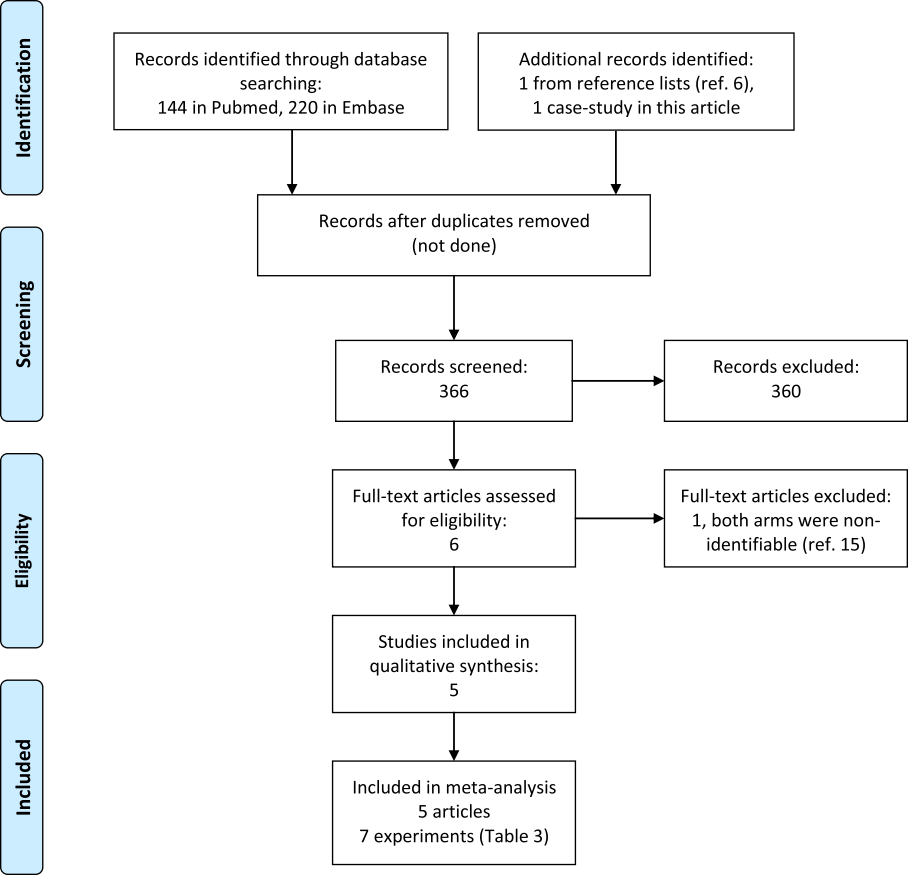

Supplement: MOESM3 [file 9433484]
